# Supplementary material for: Too big to be noticed: cryptic invasion of Asian camel crickets in North American houses
Source: PeerJ. 2014 Sep 2;2:e523. doi: 10.7717/peerj.523 (PMC4157299; doi:10.7717/peerj.523)
Supplement: Supplemental Information 2 — Data from photographs and specimens of camel crickets found in homes, as submitted by citizen scientists. [file peerj-02-523-s002.xlsx]

## Sheet: Sheet1
Photo date	Town	State	Zip code	Country	Genus	ID
2013-05-13	Colorado Springs	CO	80903	United States	Ceuthophilus	Ceuthophilus
2014-01-17	Broomfield	CO	80020	United States	Ceuthophilus	Ceuthophilus
2013-10-25	Washington	DC	20002	United States	Diestrammena	Diestrammena
2012-01-07	Smyrna	DE	19977	United States	Diestrammena	Diestrammena asynamora
2012-09-16	Harrington	DE	19952	United States	Diestrammena	Diestrammena
2013-07-06	Talking Rock	GA	30175	United States	Diestrammena	Diestrammena asynamora
2013-09-27	Atlanta	GA	30309	United States	Diestrammena	Diestrammena asynamora
2013-09-25	Floyd	IA	50435	United States	Ceuthophilus	Ceuthophilus
2013-10-01	Centralia	IL	62801	United States	Diestrammena	Diestrammena asynamora
2013-12-02	wilmette	IL	60091	United States	Diestrammena	Diestrammena asynamora
2013-10-06	WaKeeney	KS	67672	United States	Ceuthophilus	Ceuthophilus
2012-11-09	Wichita	KS	67202	United States	Diestrammena	Diestrammena asynamora
2013-11-07	Louisville	KY	40204	United States	Diestrammena	Diestrammena
2014-01-05	Lexington	MA	02421	United States	Ceuthophilus	Ceuthophilus
2013-06-24	Boxford	MA	01921	United States	Diestrammena	Diestrammena japanica
2013-07-23	Boxford	MA	01921	United States	Diestrammena	Diestrammena japanica
2012-10-19	New Germany	MD	21536	United States	Ceuthophilus	Ceuthophilus
2012-05-15	Bethesda	MD	20814	United States	Diestrammena	Diestrammena asynamora
2012-09-17	Silver Spring	MD	20910	United States	Diestrammena	Diestrammena asynamora
2012-09-30	Annapolis	MD	21401	United States	Diestrammena	Diestrammena asynamora
2012-11-09	Chestertown	MD	21620	United States	Diestrammena	Diestrammena sp.
2012-11-06	Jackson	MD	21903	United States	Diestrammena	Diestrammena sp.
2013-02-27	Baltimore	MD	21202	United States	Diestrammena	Diestrammena sp.
2013-05-03	Colony Square	MD	20653	United States	Diestrammena	Diestrammena sp.
2013-05-20	Lexington Park	MD	20653	United States	Diestrammena	Diestrammena
2013-08-15	Upper Marlboro	MD	20774	United States	Diestrammena	Diestrammena asynamora
2013-09-27	Bethesda	MD	20817	United States	Diestrammena	Diestrammena asynamora
2014-01-10	Glen Burnie	MD	21060	United States	Diestrammena	Diestrammena asynamora
2014-01-19	Hughesville	MD	20637	United States	Diestrammena	Diestrammena asynamora
2013-10-10	Ellicott City	MD	21043	United States	Diestrammena	Diestrammena
2013-10-25	Annapolis	MD	21401	United States	Diestrammena	Diestrammena asynamora
2013-10-23	Mount Rainier	MD	20712	United States	Diestrammena	Diestrammena asynamora
	baltimore	MD	21239	United States	Diestrammena	Diestrammena asynamora
2012-12-19	South Haven	MI	49090	United States	Diestrammena	Diestrammena sp.
2013-05-05	Columbia	MO	65202	United States	Ceuthophilus	Ceuthophilus
2012-11-30	Hinton	MO	65202	United States	Ceuthophilus	Ceuthophilus
2013-04-09	Hinton	MO	65202	United States	Ceuthophilus	Ceuthophilus
2012-06-26	Canton	MO	63435	United States	Ceuthophilus	Ceuthophilus
2012-01-06	Buchanan	MO	63751	United States	Diestrammena	Diestrammena asynamora
2013-09-27	Calhoun	MO	65323	United States	Diestrammena	Diestrammena asynamora
2013-09-29	Van Buren	MO	63965	United States	Diestrammena	Diestrammena asynamora
2013-10-11	Springfield	MO	65803	United States	Diestrammena	Diestrammena asynamora
2013-12-10	Saint Louis	MO	63130	United States	Diestrammena	Diestrammena asynamora
2012-07-22	Mt Airy	NC	27030	United States	Ceuthophilus	Ceuthophilus
2012-11-27	Asheville	NC	28801	United States	Ceuthophilus	Ceuthophilus
2013-06	Chapel Hill	NC	27516	United States	Ceuthophilus	Ceuthophilus
2012-08-12	Asheville	NC	28801	United States	Ceuthophilus	Ceuthophilus
2013-10-12	Chapel Hill	NC	27516	United States	Ceuthophilus	Ceuthophilus
2012-01-07	Apex	NC	27502	United States	Diestrammena	Diestrammena asynamora
2014-12-22	Yanceyville	NC	27379	United States	Diestrammena	Diestrammena asynamora
2012-07-09	Hays	NC	28635	United States	Diestrammena	Diestrammena
2012-02-08	Walnut Cove	NC	27052	United States	Diestrammena	Diestrammena asynamora
2012-08-27	Raleigh	NC	27603	United States	Diestrammena	Diestrammena asynamora
2011-09-18	Cary	NC	27513	United States	Diestrammena	Diestrammena asynamora
2012-11-29	Greensboro	NC	27401	United States	Diestrammena	Diestrammena sp.
2012-11-29	Raleigh	NC	27603	United States	Diestrammena	Diestrammena asynamora
2013-02-27	Clayton	NC	27520	United States	Diestrammena	Diestrammena asynamora
2013-03-02	Alligoods	NC	27889	United States	Diestrammena	Diestrammena asynamora
	Willard	NC	28478	United States	Diestrammena	Diestrammena sp.
2013-06-23	Raleigh	NC	27607	United States	Diestrammena	Diestrammena asynamora
2013-06-25	Raleigh	NC	27609	United States	Diestrammena	Diestrammena asynamora
2013-07-02	Raleigh	NC	27604	United States	Diestrammena	Diestrammena asynamora
	Cary	NC	27513	United States	Diestrammena	Diestrammena asynamora
	Raleigh	NC	27613	United States	Diestrammena	Diestrammena asynamora
2013-07-18	Raleigh	NC	27604	United States	Diestrammena	Diestrammena asynamora
2013-05-23	Raleigh	NC	27616	United States	Diestrammena	Diestrammena asynamora
2012-08-02	Saxapahaw	NC	27340	United States	Diestrammena	Diestrammena asynamora
2013-06	Chapel Hill	NC	27516	United States	Diestrammena	Diestrammena
2012-11-07	Hillsborough	NC	27278	United States	Diestrammena	Diestrammena
2013-08-24	Raleigh	NC	27607	United States	Diestrammena	Diestrammena
2013-07	Raleigh	NC	27603	United States	Diestrammena	Diestrammena
2013-09-26	Raleigh	Nc	27612	United States	Diestrammena	Diestrammena asynamora
2013-09-27	Sanford	Nc	27330	United States	Diestrammena	Diestrammena asynamora
2013-09-28	Raleigh	NC	27607	United States	Diestrammena	Diestrammena asynamora
2002-11-15	Chapel Hill	NC	27514	United States	Diestrammena	Diestrammena asynamora
2013-09-29	Raleigh	NC	27613	United States	Diestrammena	Diestrammena asynamora
2013-09-26	Raleigh	NC	27604	United States	Diestrammena	Diestrammena asynamora
2013-09-28	Raleigh	NC	27603	United States	Diestrammena	Diestrammena asynamora
2013-10-01	Greensboro	NC	27403	United States	Diestrammena	Diestrammena asynamora
	Hillsborough	NC	27278	United States	Diestrammena	Diestrammena asynamora
2014-03-23	Raleigh	NC	27606	United States	Diestrammena	Diestrammena asynamora
2013-12-22	Millesville	NC	27244	United States	Diestrammena	Diestrammena
	Frankliton	NC	27525	United States	Diestrammena	Diestrammena asynamora
2013-10-11	Raleigh	NC	27604	United States	Diestrammena	Diestrammena asynamora
2013-10-12	Cary	NC	27511	United States	Diestrammena	Diestrammena asynamora
2013-10-13	Burlington	NC	27215	United States	Diestrammena	Diestrammena asynamora
2013-10-13	Trent Woods	NC	28562	United States	Diestrammena	Diestrammena asynamora
2013-10-13	Durham	NC	27713	United States	Diestrammena	Diestrammena asynamora
2013-10-15	Durham	NC	27713	United States	Diestrammena	Diestrammena asynamora
2013-10-15	Raleigh	NC	27606	United States	Diestrammena	Diestrammena asynamora
2013-10-26	Carrboro	NC	27510	United States	Diestrammena	Diestrammena asynamora
2013-10-22	Cary	NC	27513	United States	Diestrammena	Diestrammena asynamora
2013-11-10	Raleigh	NC	27606	United States	Diestrammena	Diestrammena
2013-11-01	Durham	NC	27701	United States	Diestrammena	Diestrammena asynamora
2013-11-14	Cary	NC	27513	United States	Diestrammena	Diestrammena asynamora
2013-11-17	Tryon	NC	28782	United States	Diestrammena	Diestrammena
2013-11-15	Raleigh	NC	27607	United States	Diestrammena	Diestrammena asynamora
2013-12-07	Garner	NC	27529	United States	Diestrammena	Diestrammena asynamora
2013-12-14	Durham	NC	27713	United States	Diestrammena	Diestrammena
2013-12-18	Hickory	NC	28601	United States	Diestrammena	Diestrammena asynamora
2013-10-12	Chapel Hill	NC	27516	United States	Diestrammena	Diestrammena
2013-10-30	Cary	NC	27513	United States	Diestrammena	Diestrammena
2013-11-04	Franklinville	NC	27248	United States	Diestrammena	Diestrammena
2013-06-09	Lyme	NH	03768	United States	Ceuthophilus	Ceuthophilus
2012-11-16	Villas	NJ	08251	United States	Diestrammena	Diestrammena asynamora
2013-07-02	Montclair	NJ	07043	United States	Diestrammena	Diestrammena japanica
2013-05-28	Holmdel	NJ	07733	United States	Diestrammena	Diestrammena japanica
2013-09-27	Ocean	NJ	07712	United States	Diestrammena	Diestrammena asynamora
2013-10-05	williams	nj	08094	United States	Diestrammena	Diestrammena
2013-10-06	Cherry Hill	NJ	08003	United States	Diestrammena	Diestrammena asynamora
2013-10-01	Clayton	NJ	08312	United States	Diestrammena	Diestrammena asynamora
2013-11-06	Bayville	NJ	08721	United States	Diestrammena	Diestrammena asynamora
2013-10-26	Clementon	NJ	08021	United States	Diestrammena	Diestrammena asynamora
2013-11-16	voorhees	NJ	08043	United States	Diestrammena	Diestrammena asynamora
2013-11-19	Sicklerville	NJ	08081	United States	Diestrammena	Diestrammena asynamora
2013-07-13	Princeton Junction	NJ	08550	United States	Diestrammena	Diestrammena
2013-12-17	Sewell	NJ	08080	United States	Diestrammena	Diestrammena asynamora
2013-12-19	Audubon	NJ	08106	United States	Diestrammena	Diestrammena asynamora
2013-12-24	South Amboy	NJ	08879	United States	Diestrammena	Diestrammena asynamora
2013-10-07	Princeton	NJ	08540	United States	Diestrammena	Diestrammena asynamora
2012-11-27	Coram	NY	11727	United States	Diestrammena	Diestrammena asynamora
2012-11-28	Bayville	NY	11709	United States	Diestrammena	Diestrammena asynamora
2012-12-12	Commack	NY	11725	United States	Diestrammena	Diestrammena sp.
	Fresh Meadows	NY	11366	United States	Diestrammena	Diestrammena asynamora
2013-10-31	new city	NY	10956	United States	Diestrammena	Diestrammena
2013-11-14	Oakland Gardens	NY	11364	United States	Diestrammena	Diestrammena asynamora
2013-11-24	Bronx	NY	10460	United States	Diestrammena	Diestrammena asynamora
2013-11-28	Bayside	NY	11364	United States	Diestrammena	Diestrammena asynamora
2013-12-08	Woodmere	NY	11598	United States	Diestrammena	Diestrammena asynamora
2012-12-04	Cincinnati	OH	45202	United States	Diestrammena	Diestrammena asynamora
2012-10-01	Cincinnati	OH	45241	United States	Diestrammena	Diestrammena asynamora
2013-10-01	Boalsburg	PA	16827	United States	Ceuthophilus	Ceuthophilus
2011-10-12	Allison Park	PA	15101	United States	Ceuthophilus	Ceuthophilus
2012-11-23	Drexel Hill	PA	19026	United States	Diestrammena	Diestrammena asynamora
2013-05-13	Media	PA	19063	United States	Diestrammena	Diestrammena
2013-07-28	Mount Gretna	Pa	17064	United States	Diestrammena	Diestrammena japanica
2013-08-09	Buckingham	PA	18912	United States	Diestrammena	Diestrammena japanica
2013-08-15	Philadelphia	PA	19103	United States	Diestrammena	Diestrammena asynamora
2013-10-21	King of Prussia	PA	19406	United States	Diestrammena	Diestrammena
2013-10-15	Wallingford	PA	19086	United States	Diestrammena	Diestrammena asynamora
2011-09-20	Swarthmore	PA	19081	United States	Diestrammena	Diestrammena asynamora
2012-01-27	Regina	Saskatchewan	S4N	Canada	Ceuthophilus	Ceuthophilus
2012-01-05	Lowrys	SC	29706	United States	Diestrammena	Diestrammena asynamora
2013-06-02	Huntingdon	TN	38344	United States	Diestrammena	Diestrammena asynamora
2013-10-06	Knoxville	TN	37920	United States	Diestrammena	Diestrammena asynamora
2013-10-17	Memphis	TN	38125	United States	Diestrammena	Diestrammena asynamora
2012-01-27	Dallas	TX	75201	United States	Ceuthophilus	Ceuthophilus
2012-03-05	Charlottesville	VA	22902	United States	Diestrammena	Diestrammena asynamora
2012-11-16	Richmond	VA	23219	United States	Diestrammena	Diestrammena sp.
2013-09-24	Milford	VA	22514	United States	Diestrammena	Diestrammena asynamora
2013-09-29	Winchester	VA	22601	United States	Diestrammena	Diestrammena asynamora
2004-11-13	Charlottesville	VA	02911	United States	Diestrammena	Diestrammena asynamora
2014-01-13	Charlottesville	VA	22903	United States	Diestrammena	Diestrammena sp.
2013-10-23	Scottsville	VA	24590	United States	Diestrammena	Diestrammena asynamora
2013-10-25	Winchester	VA	22601	United States	Diestrammena	Diestrammena asynamora
2013-10-27	Manassas	VA	20112	United States	Diestrammena	Diestrammena
2013-11-15	Radford	VA	24142	United States	Diestrammena	Diestrammena
2013-11-21	Rixeyville	VA	22737	United States	Diestrammena	Diestrammena asynamora
2013-10-07	Bristol	VA	24201	United States	Diestrammena	Diestrammena
2013-04-12	Urbanna	Virginia	23175	United States	Diestrammena	Diestrammena asynamora
2013-10-02	Manassas	Virginia	20111	United States	Diestrammena	Diestrammena asynamora
2013-10-03	Manassas	Virginia	20110	United States	Diestrammena	Diestrammena asynamora
2011-06-29	Stoughton	WI	53589	United States	Diestrammena	Diestrammena asynamora

## Sheet: Data to add in
Add in Data (Identifiable once I learned about the mickey mouse side mark)
number	zip	ID
51	11366	Diestrammena asynamora
69	27278	Diestrammena asynamora
13	28478	Diestrammena sp.	couldn't clearly see back legs, but clearly Diestrammena from pattern. One of oldest photos
24	27613	Diestrammena asynamora	couldn't clearly see back legs, but clearly Diestrammena asynamora from pattern. One of oldest photos
