# Supplementary material for: Too big to be noticed: cryptic invasion of Asian camel crickets in North American houses
Source: PeerJ. 2014 Sep 2;2:e523. doi: 10.7717/peerj.523 (PMC4157299; doi:10.7717/peerj.523)
Supplement: Supplemental Information 4 — Data on camel crickets recovered from pitfall traps placed in urban yards in Raleigh, NC. [file peerj-02-523-s004.xlsx]

## Sheet: data
House #	Distance code	Distance	Participant response to question, "are there camel crickets in your house?"	date trap set	date check 1	check 1 Diestramenna asynamora	check 1 Ceuthophilus	date check 2	check 2 Diestramenna asynamora	Check 2 Ceuthophilus	Total Diestrammena asynamora in checks 1&2	Total Ceuthophilus
1	a	1m	Y?	2013-07-02	2013-07-03	0	0	2013-07-04	1	0	1	0
1	b	4m	Y?	2013-07-02	2013-07-03	0	0	2013-07-04	0	0	0	0
1	c	8m	Y?	2013-07-02	2013-07-03	0	0	2013-07-04	0	0	0	0
2	a	1m	Y	2013-07-02	2013-07-03	9	0	2013-07-04	10	0	19	0
2	b	4m	Y	2013-07-02	2013-07-03	0	0	2013-07-04	0	0	0	0
2	c	8m	Y	2013-07-02	2013-07-03	2	0	2013-07-04	1	0	3	0
3	a	1m	Y?	2013-07-03	2013-07-04	0	0	2013-07-05	0	0	0	0
3	b	4m	Y?	2013-07-03	2013-07-04	0	0	2013-07-05	0	0	0	0
3	c	8m	Y?	2013-07-03	2013-07-04	0	0	2013-07-05	0	0	0	0
4	a	1m	no response	2013-07-03	2013-07-04	0	0	2013-07-05	0	0	0	0
4	b	4m	no response	2013-07-03	2013-07-04	0	0	2013-07-05	0	0	0	0
4	c	8m	no response	2013-07-03	2013-07-04	0	0	2013-07-05	0	0	0	0
5	a	1m	Y?	2013-07-08	2013-07-09	0	0	2013-07-10	3	0	3	0
5	b	4m	Y?	2013-07-08	2013-07-09	0	0	2013-07-10	1	0	1	0
5	c	8m	Y?	2013-07-08	2013-07-09	0	0	2013-07-10	1	0	1	0
6	a	1m	Y	2013-07-08	2013-07-09	2	0	2013-07-10	1	0	3	0
6	b	4m	Y	2013-07-08	2013-07-09	0	0	2013-07-10	0	0	0	0
6	c	8m	Y	2013-07-08	2013-07-09	0	0	2013-07-10	0	0	0	0
7	a	1m	Y	2013-07-24	2013-07-25	41	0	2013-07-26	7	0	48	0
7	b	4m	Y	2023-07-24	2013-07-25	0	0	2013-07-26	0	0	0	0
7	c	8m	Y	2023-07-24	2013-07-25	0	0	2013-07-26	0	0	0	0
8	a	1m	Y	2023-07-24	2013-07-25	16	0	2013-07-26	25	0	41	0
8	b	4m	Y	2023-07-24	2013-07-25	7	0	2013-07-26	1	0	8	0
8	c	8m	Y	2023-07-24	2013-07-25	3	0	2013-07-26	0	0	3	0
9	a	1m	?	2023-07-24	2013-07-25	0	0	2013-07-26	0	0	0	0
9	b	4m	?	2023-07-24	2013-07-25	0	0	2013-07-26	0	0	0	0
9	c	8m	?	2023-07-24	2013-07-25	0	0	2013-07-26	0	0	0	0
10	a	1m	Y	2023-07-24	2013-07-25	18	0	2013-07-26	4	0	22	0
10	b	4m	Y	2023-07-24	2013-07-25	4	0	2013-07-26	0	0	4	0
10	c	8m	Y	2023-07-24	2013-07-25	1	0	2013-07-26	0	0	1	0
